# Supplementary material for: Self-assembly of a metal–organic cage-like structure bearing cofacial redox-active bis-(o-semiquinone) copper(ii) units
Source: Royal Society of Chemistry journal article supplement (doi:10.1039/d3dt02855k), 2023-01-01
Supplement: d3dt02855k1.pdf [file d3dt02855k1.pdf]

Supporting Information for the manuscript:

## **A self-assembling of a metal-organic cage-like structure bearing cofacial redox-active bis-(o-semiquinone) copper(II) units**

Anna V. Cherkasova, Anton V. Cherkasov, Konstantin A. Martyanov, Artem S. Bogomyakov, V. N. Khrustalev, Alexander A. Kissel, Konstantin A. Kozhanov, Viacheslav A. Kuropatov\* and Vladimir K. Cherkasov

### Table of Contents

|                                                                         |    |
|-------------------------------------------------------------------------|----|
| Compounds formulae.....                                                 | 2  |
| X-ray Diffraction Crystal Structure of di-o-quinone <b>1</b> .....      | 3  |
| X-ray Diffraction Crystal Structure of complex <b>2a</b> .....          | 3  |
| X-ray Diffraction Crystal Structure of complex <b>2b</b> .....          | 4  |
| X-ray Diffraction Crystal Structure of complex <b>2c</b> .....          | 4  |
| Crystal data and structures refinement details for <b>1, 2a-c</b> ..... | 5  |
| UV/vis Measurements .....                                               | 6  |
| Cyclic voltammetry Measurements .....                                   | 8  |
| IR spectroscopy data.....                                               | 11 |
| <sup>1</sup> H- and <sup>13</sup> C-NMR Spectra .....                   | 13 |
| Magnetic measurements data.....                                         | 15 |
| Electrospray Ionization Mass Spectrometry Analysis.....                 | 17 |

## Compounds formulae

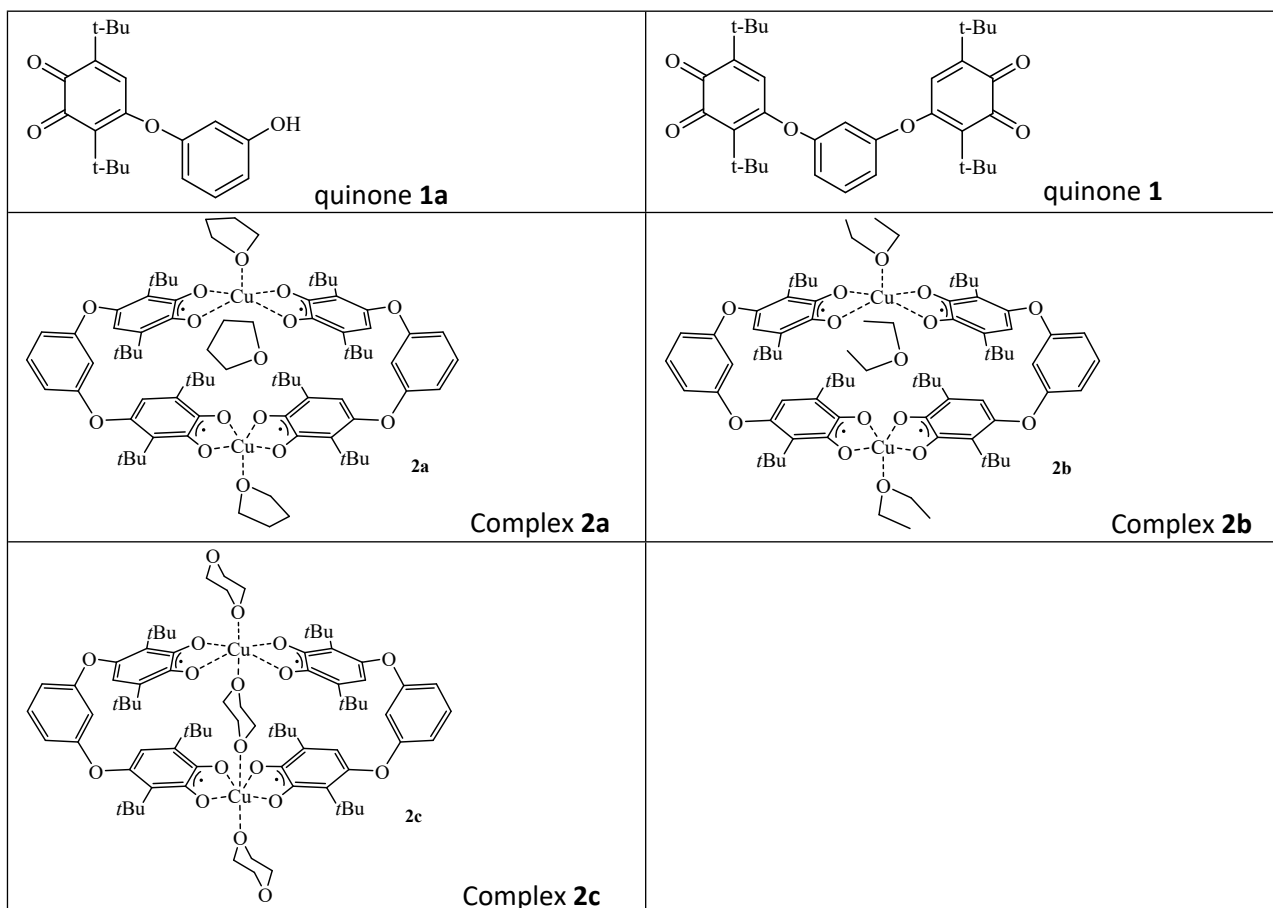

## X-ray diffractometry data

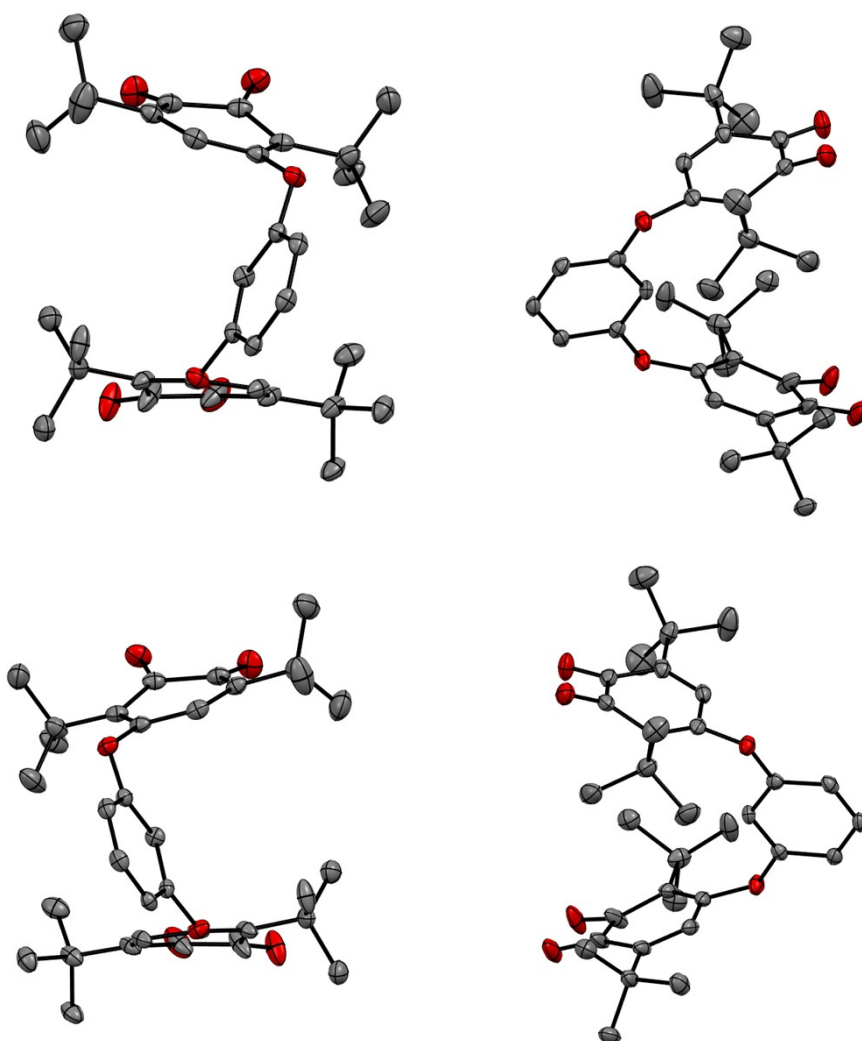

Figure S11. Enantiomeric forms of the ligand (top and bottom)

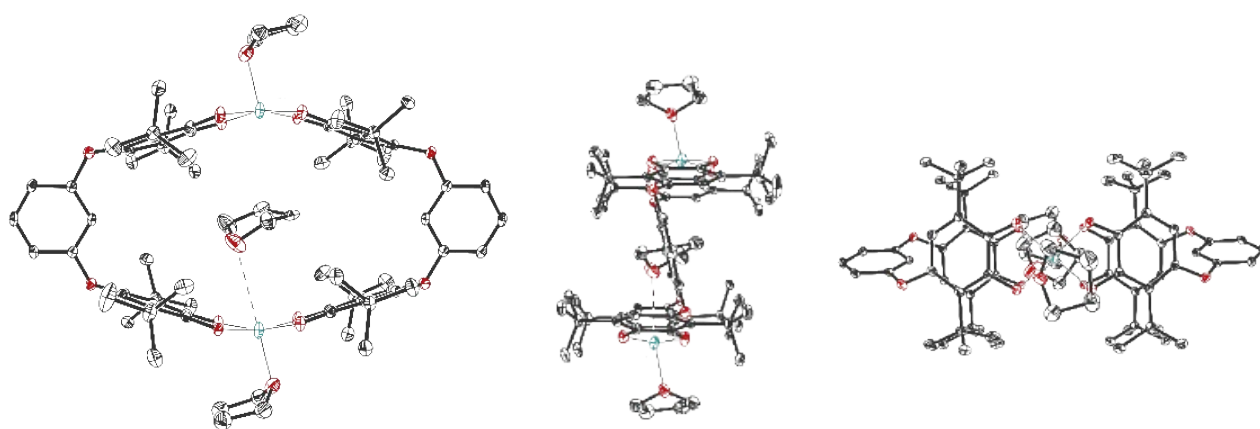

Figure S12. Front (*a*), side (*b*) and above (*c*) view of cage **2a**. Thermal ellipsoids are given with 30% probability level. All hydrogen atoms are omitted for clarity. Color code: Cu, blue; O, red; C, black.

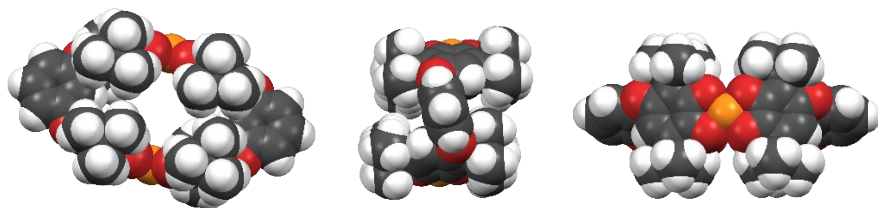

Fig. S13. Front (*a*), side (*b*) and above (*c*) view of cage **2a** in space-filling representation. Color code: Cu, orange; O, red; C, grey; H, white.

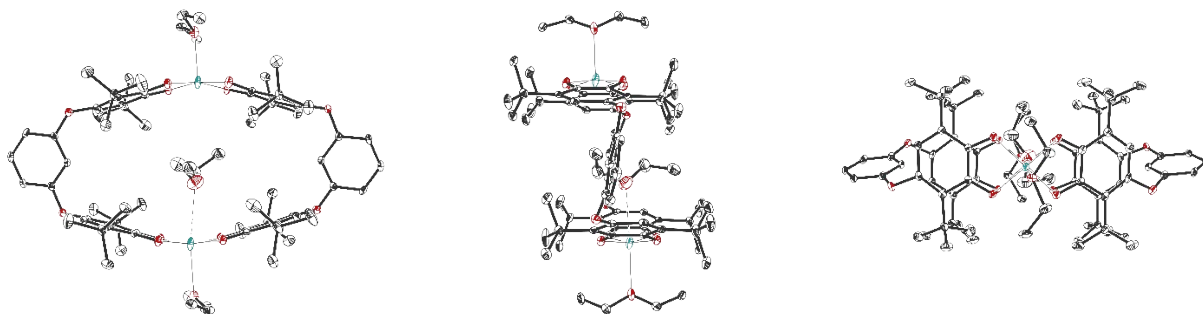

Figure S14. Front (*a*), side (*b*) and above (*c*) view of cage **2b**. Thermal ellipsoids are given with 30% probability level. All hydrogen atoms are omitted for clarity. Color code: Cu, blue; O, red; C, black.

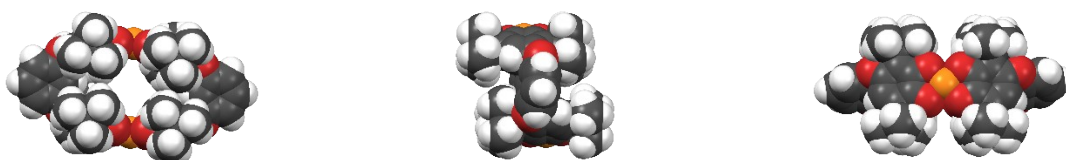

Fig. S15. Front (*a*), side (*b*) and above (*c*) view of cage **2b** in space-filling representation. Color code: Cu, orange; O, red; C, grey; H, white.

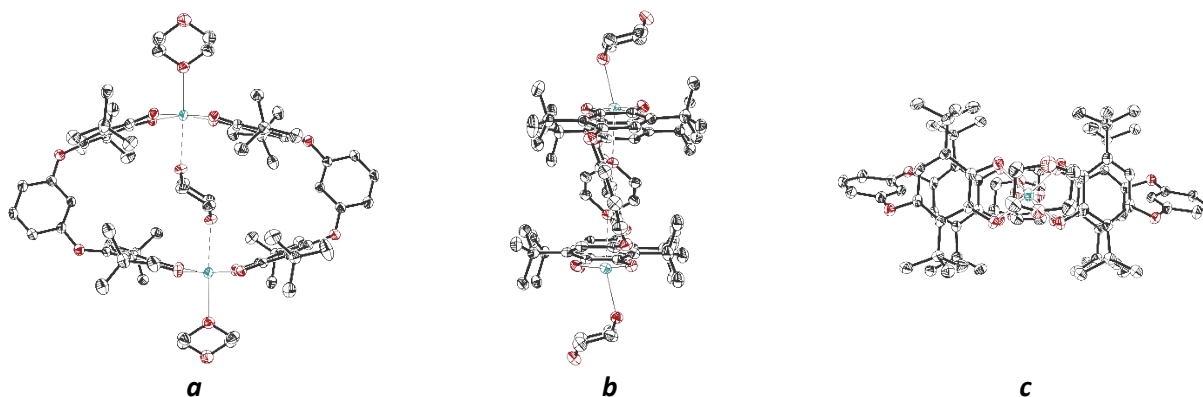

Figure S16. Front (*a*), side (*b*) and above (*c*) view of cage **2c**. Thermal ellipsoids are given with 30% probability level. All hydrogen atoms are omitted for clarity. Color code: Cu, blue; O, red; C, black.

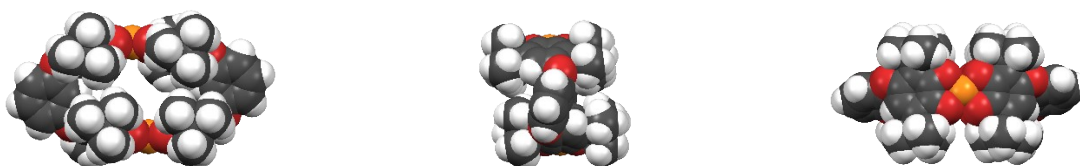

Fig. S17. Front (*a*), side (*b*) and above (*c*) view of cage **2c** in space-filling representation. Color code: Cu, orange; O, red; C, grey; H, white.

Table S11. Crystal data and structures refinement details for **1**, **2a-c**.

|                                                                             | <b>1</b>                                                      | <b>2a</b>                                                              | <b>2b</b>                                                        | <b>2c</b>                                                        |
|-----------------------------------------------------------------------------|---------------------------------------------------------------|------------------------------------------------------------------------|------------------------------------------------------------------|------------------------------------------------------------------|
| Formula                                                                     | C <sub>38</sub> H <sub>48</sub> N <sub>2</sub> O <sub>6</sub> | C <sub>83.6</sub> H <sub>122.4</sub> Cu <sub>2</sub> O <sub>18.6</sub> | C <sub>80</sub> H <sub>114</sub> Cu <sub>2</sub> O <sub>15</sub> | C <sub>86</sub> H <sub>120</sub> Cu <sub>2</sub> O <sub>21</sub> |
| M                                                                           | 628.78                                                        | 1552.09                                                                | 1442.79                                                          | 1616.88                                                          |
| T, K                                                                        | 100.0(2)                                                      | 100.0(2)                                                               | 100.0(2)                                                         | 100.0(2)                                                         |
| λ, Å                                                                        | 0.71073                                                       | 0.71073                                                                | 0.71073                                                          | 0.79313                                                          |
| Crystal system                                                              | Triclinic                                                     | Triclinic                                                              | Triclinic                                                        | Monoclinic                                                       |
| Space group                                                                 | <i>P</i> -1                                                   | <i>P</i> -1                                                            | <i>P</i> -1                                                      | <i>P</i> <sub>2</sub> /c                                         |
| a, Å                                                                        | 9.1464(4)                                                     | 13.7617(10)                                                            | 11.2133(5)                                                       | 14.2710(9)                                                       |
| b, Å                                                                        | 9.8897(4)                                                     | 13.8309(10)                                                            | 14.5574(7)                                                       | 17.2741(14)                                                      |
| c, Å                                                                        | 20.7789(8)                                                    | 14.3002(10)                                                            | 14.7287(7)                                                       | 17.9562(16)                                                      |
| α, deg                                                                      | 77.342(2)                                                     | 62.027(2)                                                              | 112.212(2)                                                       | 90                                                               |
| β, deg                                                                      | 77.4140(10)                                                   | 63.270(2)                                                              | 100.457(2)                                                       | 99.095(10)                                                       |
| γ, deg                                                                      | 76.279(2)                                                     | 89.914(2)                                                              | 110.623(2)                                                       | 90                                                               |
| V, Å <sup>3</sup>                                                           | 1754.03(13)                                                   | 2069.9(3)                                                              | 1941.00(16)                                                      | 4370.9(6)                                                        |
| Z                                                                           | 2                                                             | 1                                                                      | 1                                                                | 2                                                                |
| <i>d</i> <sub>calc</sub> , g/cm <sub>3</sub>                                | 1.191                                                         | 1.245                                                                  | 1.234                                                            | 1.128                                                            |
| μ, mm <sup>-1</sup>                                                         | 0.080                                                         | 0.580                                                                  | 0.610                                                            | 0.731                                                            |
| <i>F</i> <sub>000</sub>                                                     | 676                                                           | 831                                                                    | 772                                                              | 1580                                                             |
| Crystal dimensions, mm                                                      | 0.41×0.27×0.07                                                | 0.35×0.29×0.14                                                         | 0.27×0.23×0.10                                                   | 0.10×0.07×0.02                                                   |
| θ range for data                                                            | 2.21–27.15                                                    | 2.74–27.34                                                             | 2.08–25.06                                                       | 2.56–30.98                                                       |
| Completeness, %                                                             | 99.2                                                          | 99.4                                                                   | 99.6                                                             | 97.5                                                             |
| HKL indices                                                                 | -11 ≤ <i>h</i> ≤ 11                                           | -17 ≤ <i>h</i> ≤ 17                                                    | -13 ≤ <i>h</i> ≤ 13                                              | -18 ≤ <i>h</i> ≤ 18                                              |
|                                                                             | -12 ≤ <i>k</i> ≤ 12                                           | -17 ≤ <i>k</i> ≤ 17                                                    | -17 ≤ <i>k</i> ≤ 17                                              | -21 ≤ <i>k</i> ≤ 21                                              |
|                                                                             | -26 ≤ <i>l</i> ≤ 26                                           | -18 ≤ <i>l</i> ≤ 18                                                    | -17 ≤ <i>l</i> ≤ 17                                              | -23 ≤ <i>l</i> ≤ 23                                              |
| Reflns. collected                                                           | 22426                                                         | 73932                                                                  | 22303                                                            | 34459                                                            |
| Reflns. unique ( <i>I</i> > 2σ( <i>I</i> ))                                 | 5296                                                          | 6932                                                                   | 4408                                                             | 7053                                                             |
| <i>R</i> <sub>int</sub>                                                     | 0.0405                                                        | 0.0581                                                                 | 0.0607                                                           | 0.0426                                                           |
| Data / restraints / parameters                                              | 7725 / 81 / 497                                               | 9290 / 652 / 619                                                       | 6868 / 438 / 464                                                 | 9770 / 18 / 449                                                  |
| <i>S</i> ( <i>F</i> <sup>2</sup> )                                          | 1.080                                                         | 1.061                                                                  | 1.003                                                            | 1.015                                                            |
| <i>R</i> <sub>1</sub> / <i>wR</i> <sub>2</sub> ( <i>I</i> > 2σ( <i>I</i> )) | 0.0554 / 0.1170                                               | 0.0712 / 0.1529                                                        | 0.0675 / 0.1494                                                  | 0.0801 / 0.1948                                                  |
| <i>R</i> <sub>1</sub> / <i>wR</i> <sub>2</sub> (all data)                   | 0.0929 / 0.1327                                               | 0.1019 / 0.1690                                                        | 0.1230 / 0.1725                                                  | 0.1057 / 0.2123                                                  |
| Largest diff. peak and hole, e/Å <sup>3</sup>                               | 0.33 / -0.43                                                  | 1.62 / -1.36                                                           | 0.73 / -0.74                                                     | 1.08 / -0.78                                                     |

Table S12. Selected bond lengths in **1**, **2a-c**.

|                          | <b>1</b> | <b>2a</b> | <b>2b</b> | <b>2c</b> |
|--------------------------|----------|-----------|-----------|-----------|
| O(1)-C(1)                | 1.215(2) | 1.286(4)  | 1.285(5)  | 1.300(5)  |
| O(2)-C(2)                | 1.208(2) | 1.290(4)  | 1.284(5)  | 1.293(4)  |
| O(5)-C(21)               | 1.217(3) | 1.286(4)  | 1.289(5)  | 1.296(5)  |
| O(6)-C(22)               | 1.214(2) | 1.286(4)  | 1.290(5)  | 1.282(5)  |
| C(1)-C(2)                | 1.557(3) | 1.472(5)  | 1.461(6)  | 1.460(5)  |
| C(21)-C(22)              | 1.544(4) | 1.469(5)  | 1.463(6)  | 1.464(6)  |
| Cu(1)-O(1)               |          | 1.942(2)  | 1.938(3)  | 1.930(3)  |
| Cu(1)-O(2)               |          | 1.924(2)  | 1.946(3)  | 1.954(3)  |
| Cu(1)-O(5A)              |          | 1.940(3)  | 1.936(3)  | 1.931(3)  |
| Cu(1)-O(6A)              |          | 1.937(2)  | 1.940(3)  | 1.946(3)  |
| Cu(1)-O <sub>solv</sub>  |          | 2.12(2)   | 2.429(4)  | 2.399(3)  |
| Cu(1)-O <sub>guest</sub> |          | 3.21(2)   | 2.84(2)   | 2.572(3)  |

## UV/vis Measurements

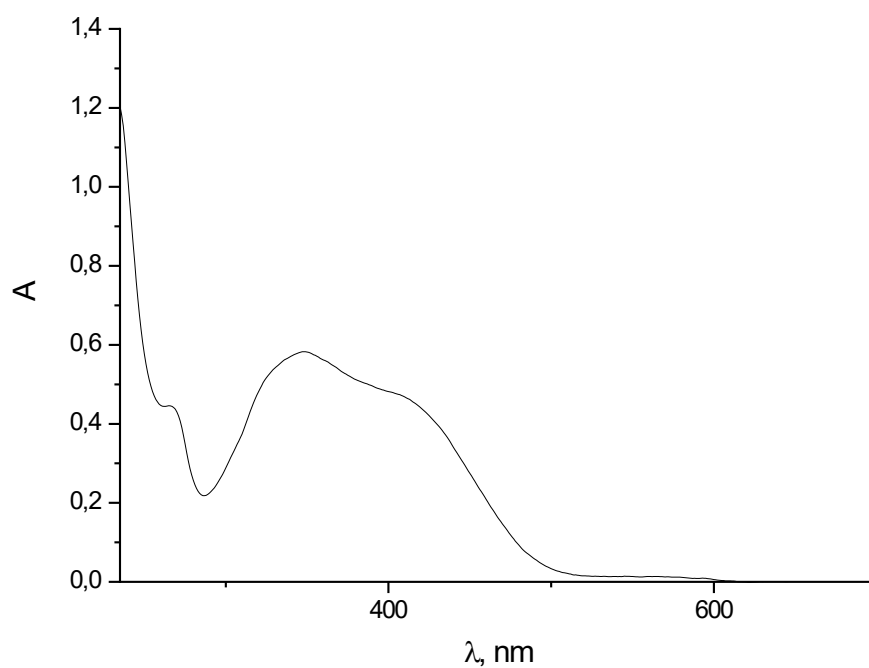

Figure S18. UV/Vis spectra of species **1** ( $1.0 \cdot 10^{-4}$  M in  $\text{CH}_2\text{Cl}_2$ ,  $l = 1$  cm),  $\lambda_{\text{max}}$ , nm ( $\epsilon$ ): 269 (4370), 346 (5810), 404 (4770), 564 (140)

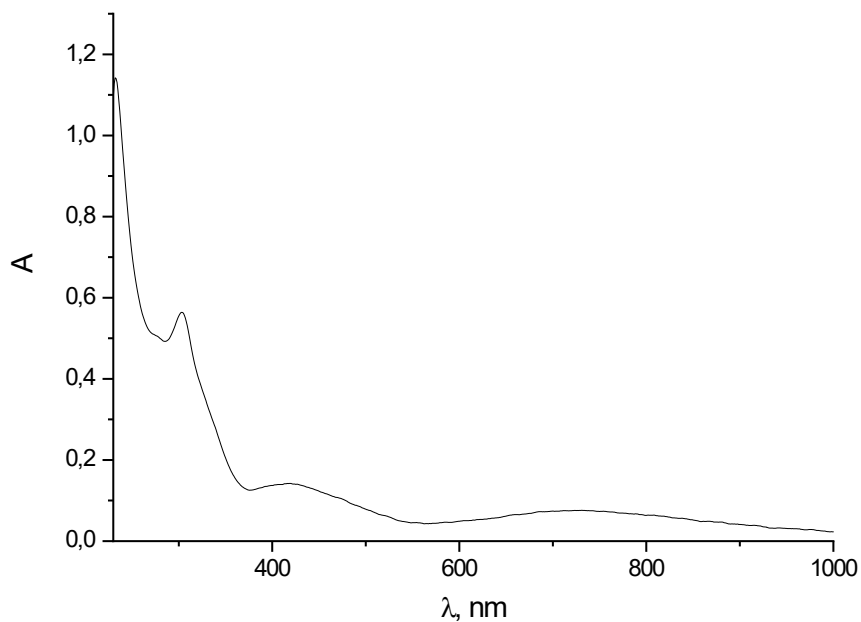

Figure S19. UV/Vis spectra of species **2a** ( $2.5 \cdot 10^{-5}$  M in  $\text{CH}_2\text{Cl}_2$ ,  $l = 1$  cm),  $\lambda_{\text{max}}$ , nm ( $\epsilon$ ): 304 (22520), 419 (5680), 728 (3040)

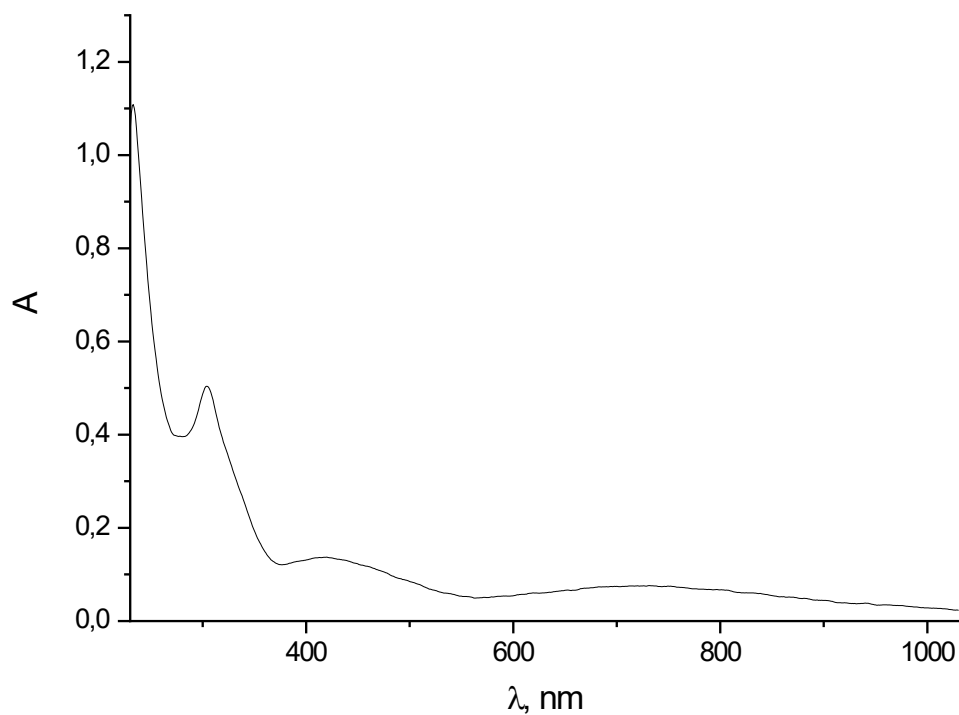

Figure SI10. UV/Vis spectra of species **2b** ( $2.5 \cdot 10^{-5}$  M in  $\text{CH}_2\text{Cl}_2$ ,  $l = 1$  cm),  $\lambda_{\text{max}}$ , nm ( $\epsilon$ ): 305 (20120), 419 (5480), 725 (3000)

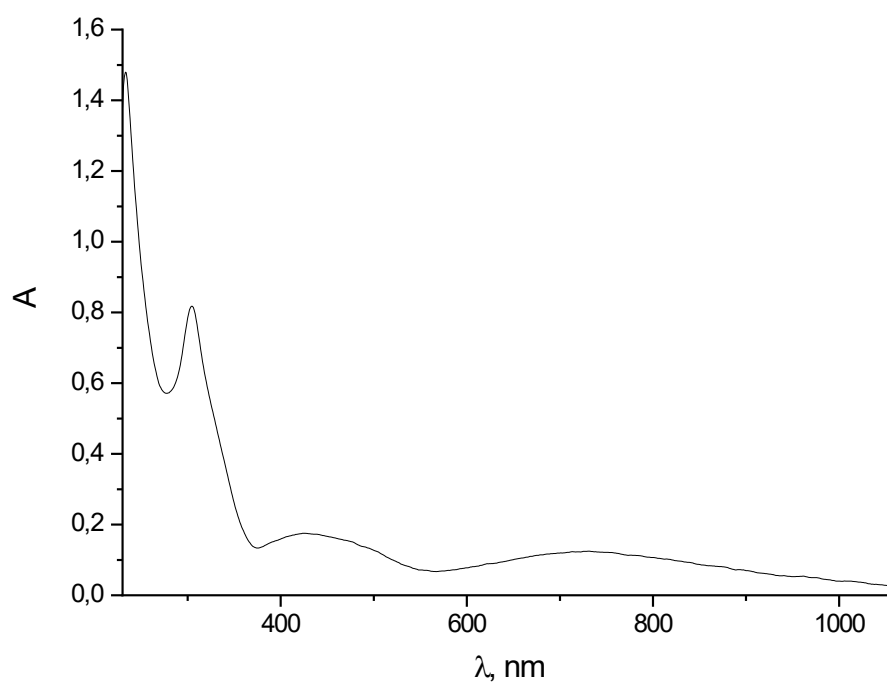

Figure SI11. UV/Vis spectra of species **2c** ( $2.5 \cdot 10^{-5}$  M in  $\text{CH}_2\text{Cl}_2$ ,  $l = 1$  cm),  $\lambda_{\text{max}}$ , nm ( $\epsilon$ ): 304 (32680), 427 (7000), 729 (4960)

## Cyclic voltammetry

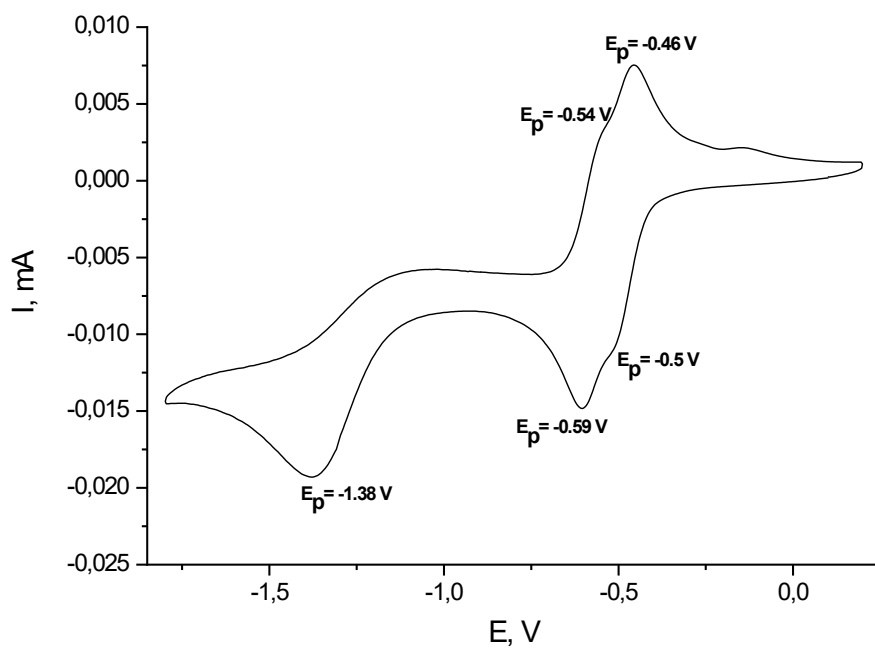

Figure SI12. Cyclic voltammogram of di-o-quinone **1** ( $1.0 \cdot 10^{-3}$  M in  $\text{CH}_2\text{Cl}_2$ , 200 mV/s, 0.2 M  $\text{Bu}_4\text{NClO}_4$ )

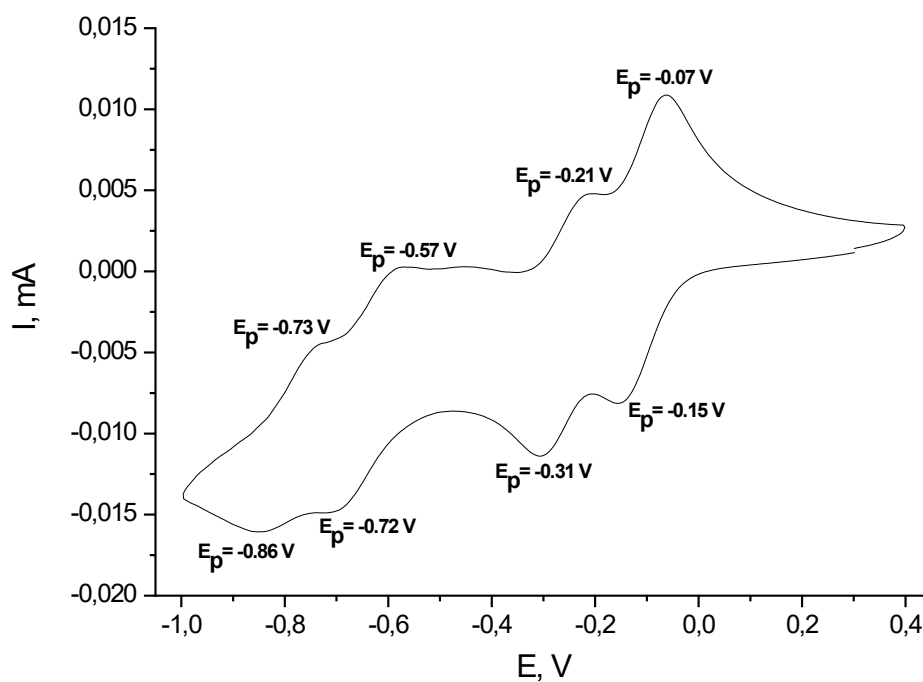

Figure SI13. Cyclic voltammogram of complex **2a** ( $1.0 \cdot 10^{-3}$  M in  $\text{CH}_2\text{Cl}_2$ , 200 mV/s, 0.2 M  $\text{Bu}_4\text{NClO}_4$ )



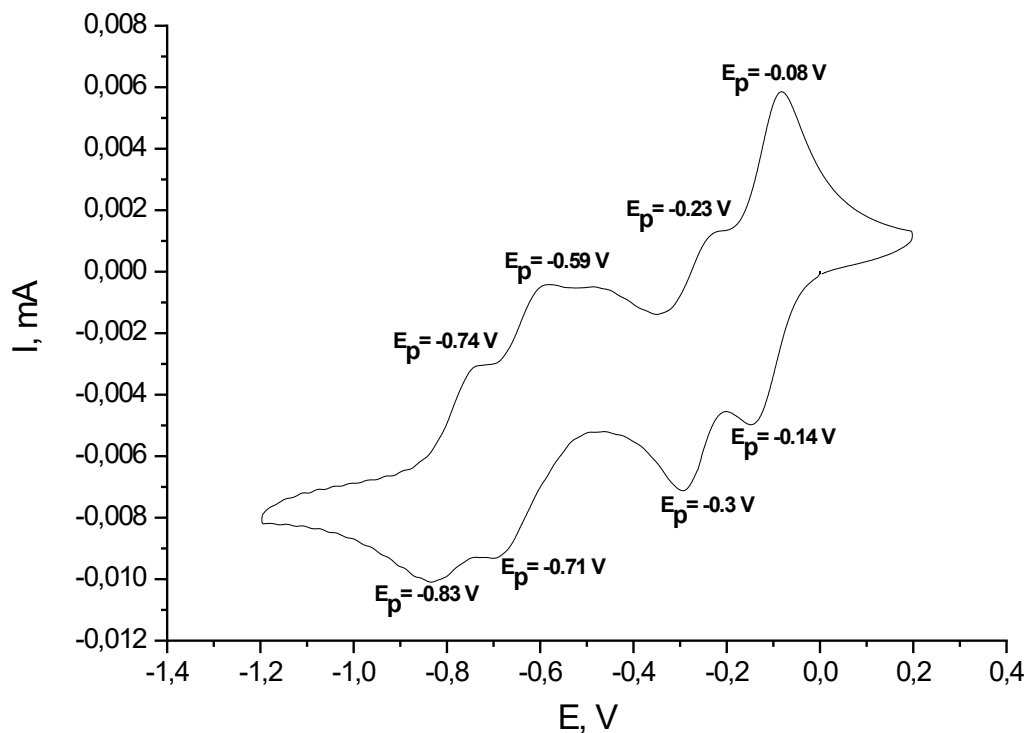

Figure SI14. Cyclic voltammogram of complex **2b** ( $1.0 \cdot 10^{-3}$  M in  $\text{CH}_2\text{Cl}_2$ , 200 mV/s, 0.2 M  $\text{Bu}_4\text{NClO}_4$ )

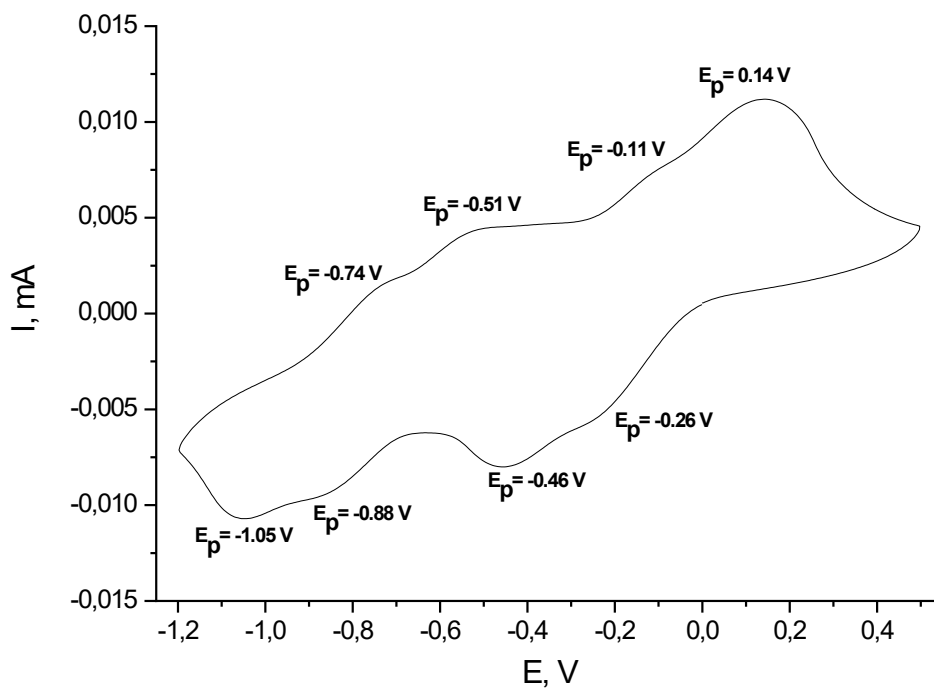

Figure SI15. Cyclic voltammogram of complex **2c** ( $1.0 \cdot 10^{-3}$  M in  $\text{CH}_2\text{Cl}_2$ , 200 mV/s, 0.2 M  $\text{Bu}_4\text{NClO}_4$ )

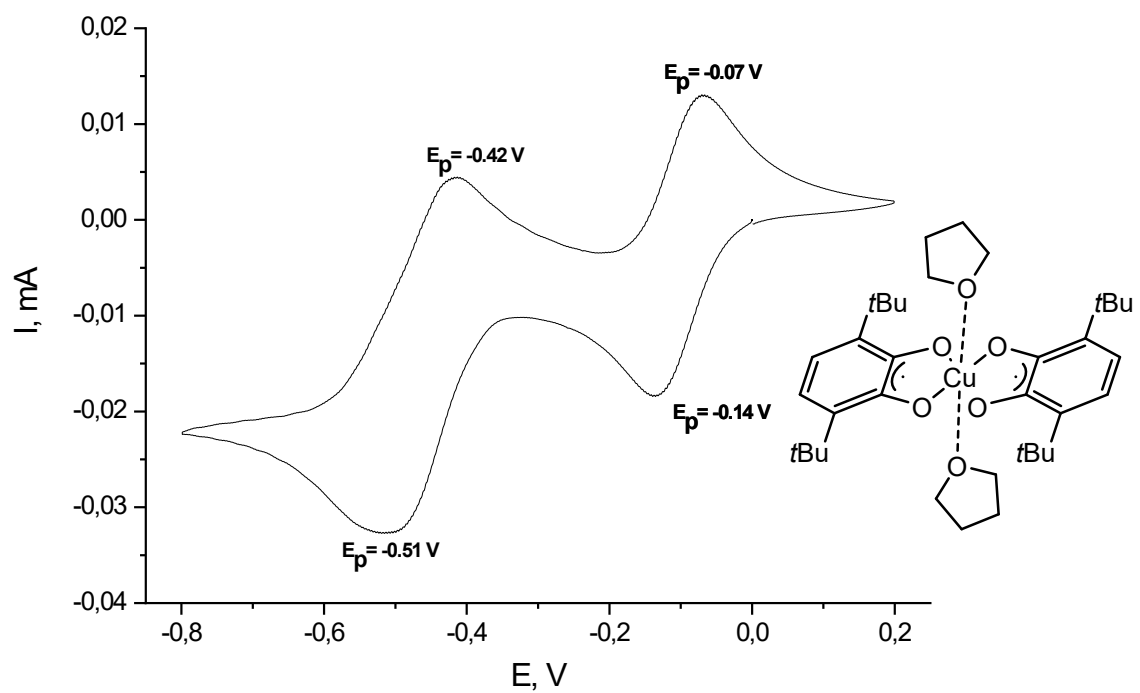

Figure S116. Cyclic voltammogram of copper bis-3,6-di-tert-butylsemiquinonate (36SQCu) ( $1 \cdot 10^{-3}$  M in CH<sub>2</sub>Cl<sub>2</sub>, 200 mV/s, 0.2 M Bu<sub>4</sub>NClO<sub>4</sub>)

## IR spectroscopy data

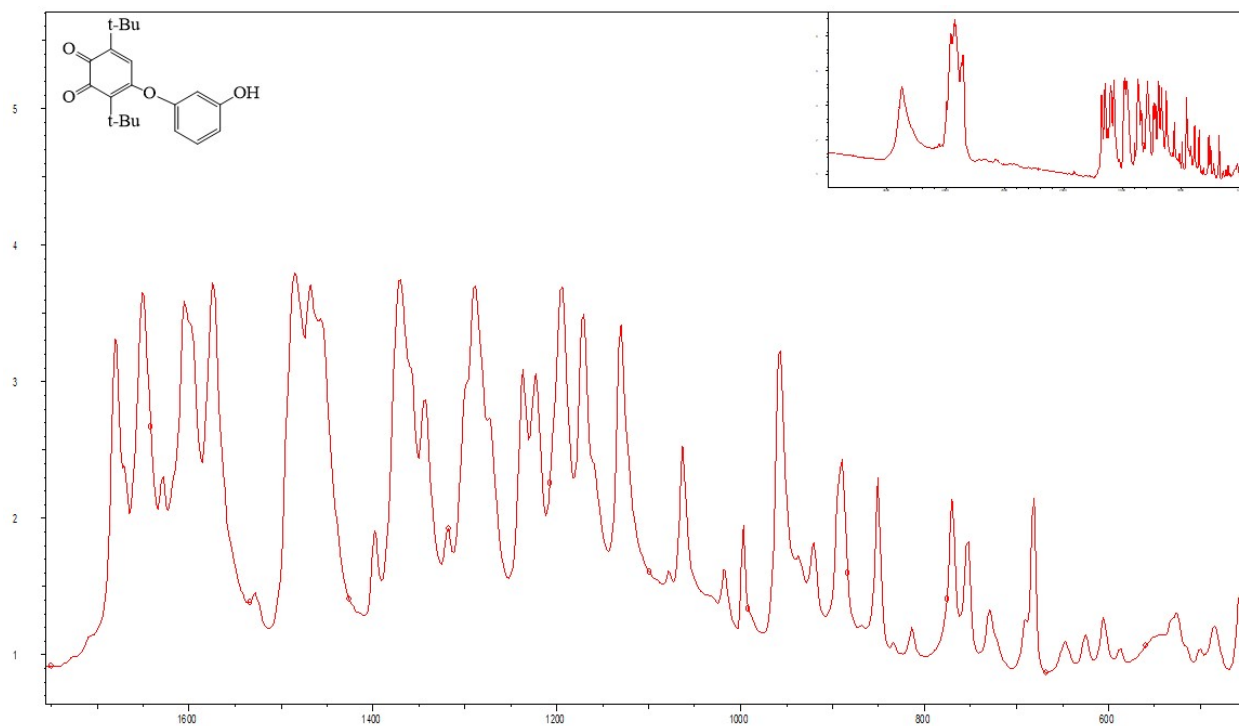

Figure. S117. IR spectrum of **1a** in nujol.

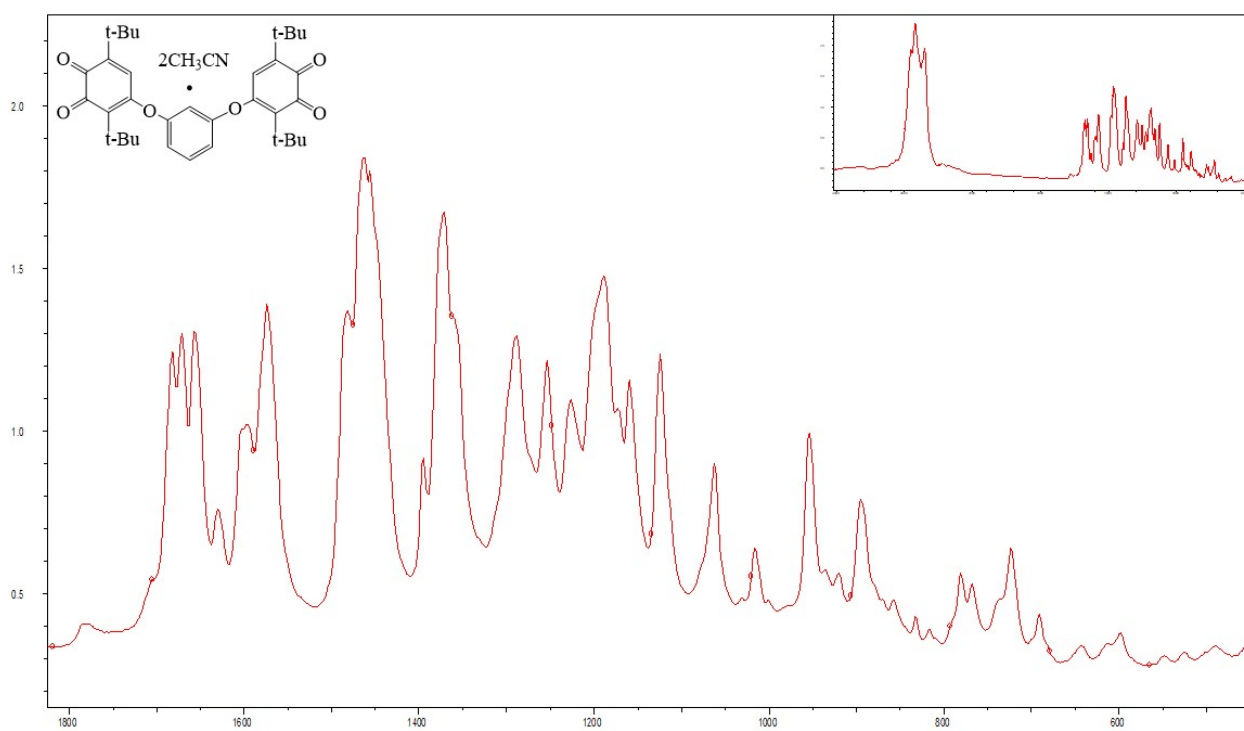

Figure. S118. IR spectrum of **1** in nujol.

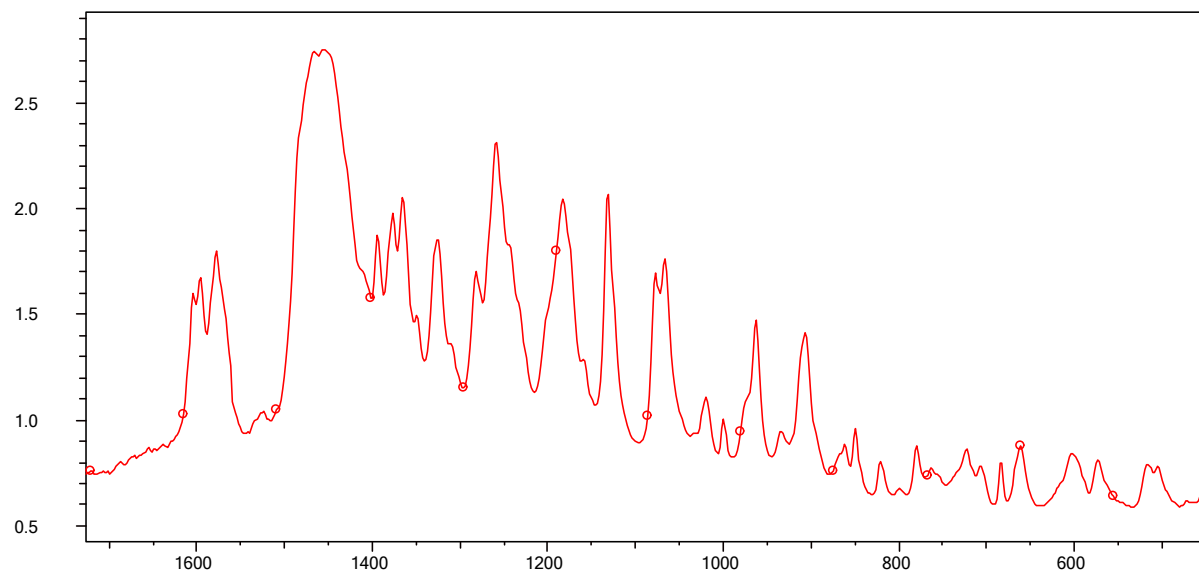

Figure. S119. IR spectrum of **2a** in nujol.

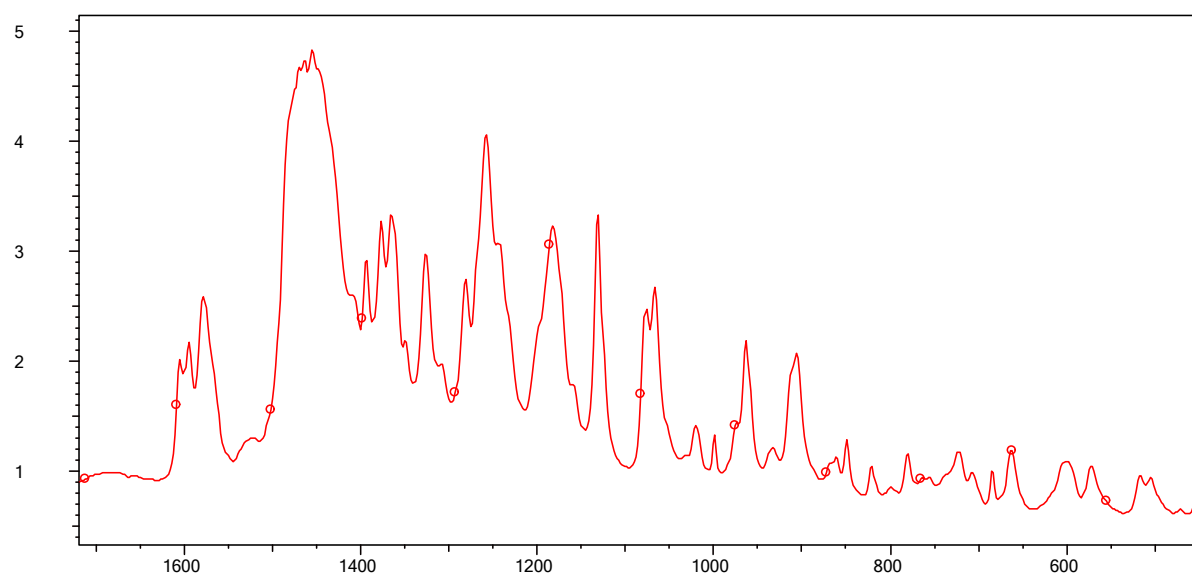

Figure. S120. IR spectrum of **2b** in nujol.

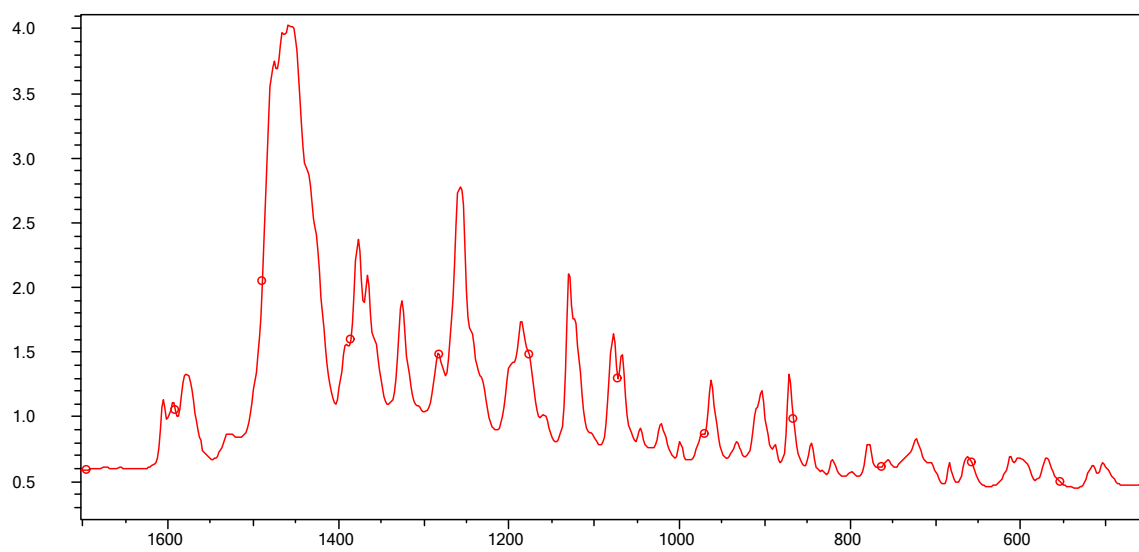

Figure. S121. IR spectrum of **2c** in nujol.

## NMR spectroscopy data

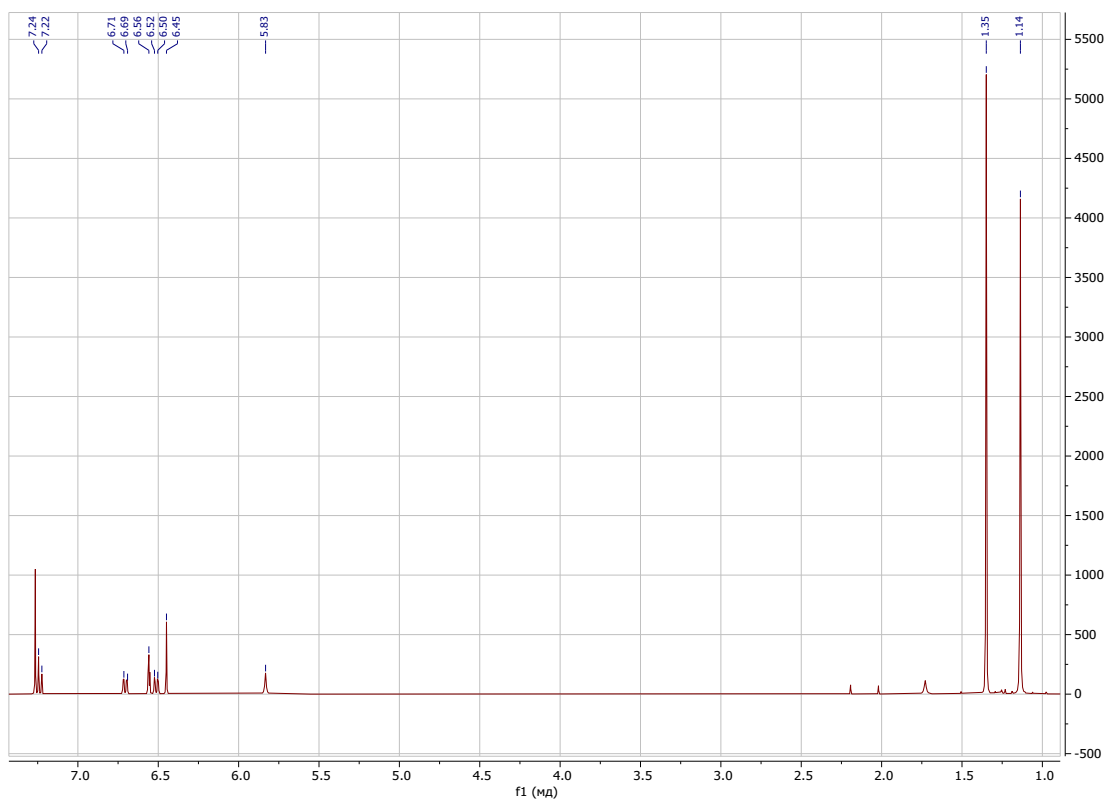

Figure. S122. <sup>1</sup>H NMR spectrum of **1a** (CDCl<sub>3</sub>)

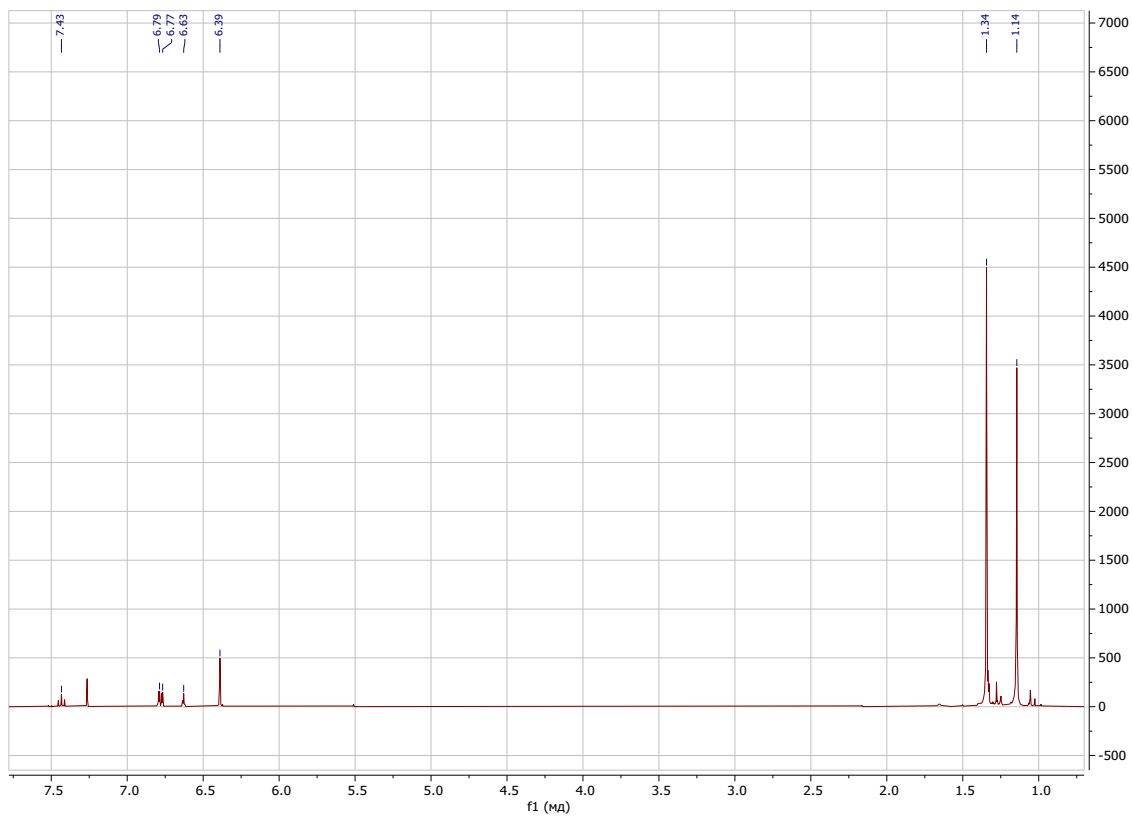

Figure. S123. <sup>1</sup>H NMR spectrum of **1** (CDCl<sub>3</sub>)

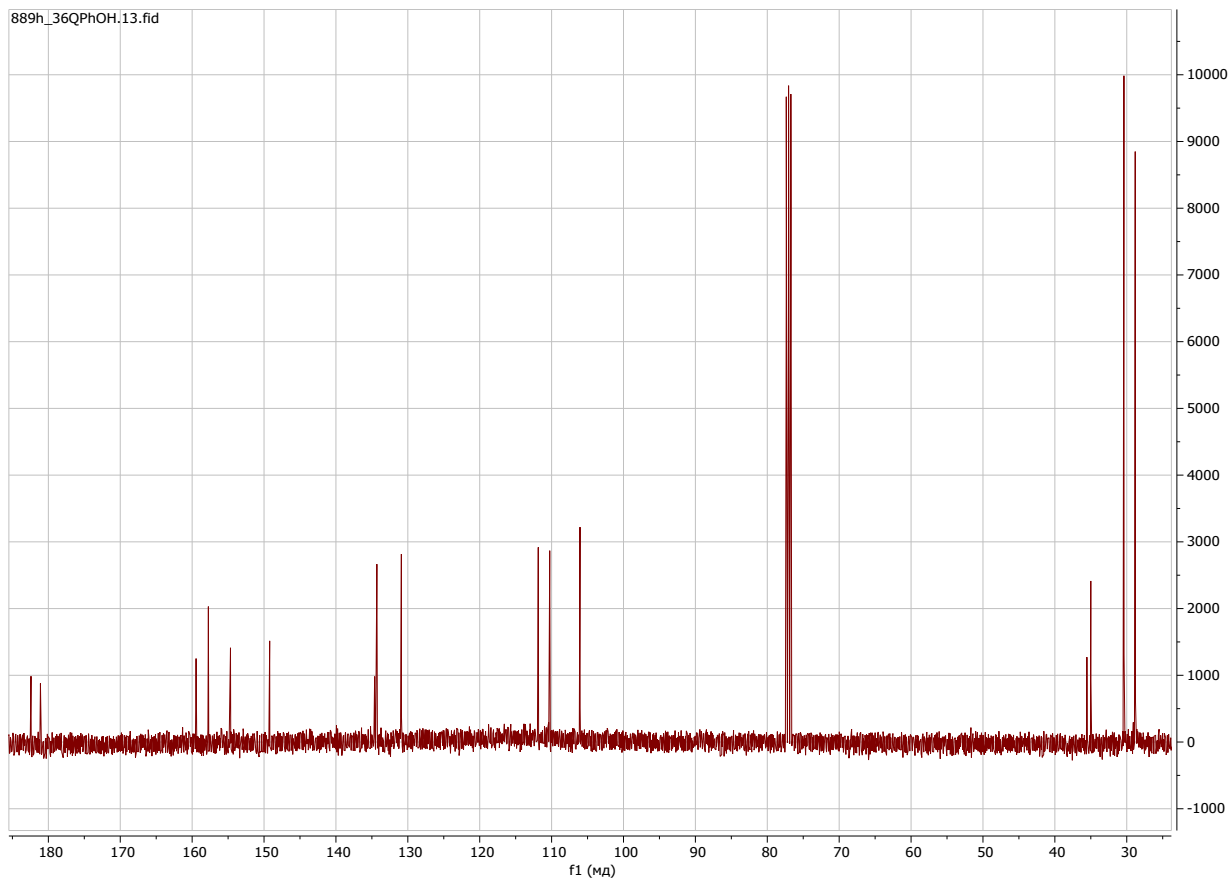

Figure. S124. <sup>13</sup>C NMR spectrum of **1a** (CDCl<sub>3</sub>)

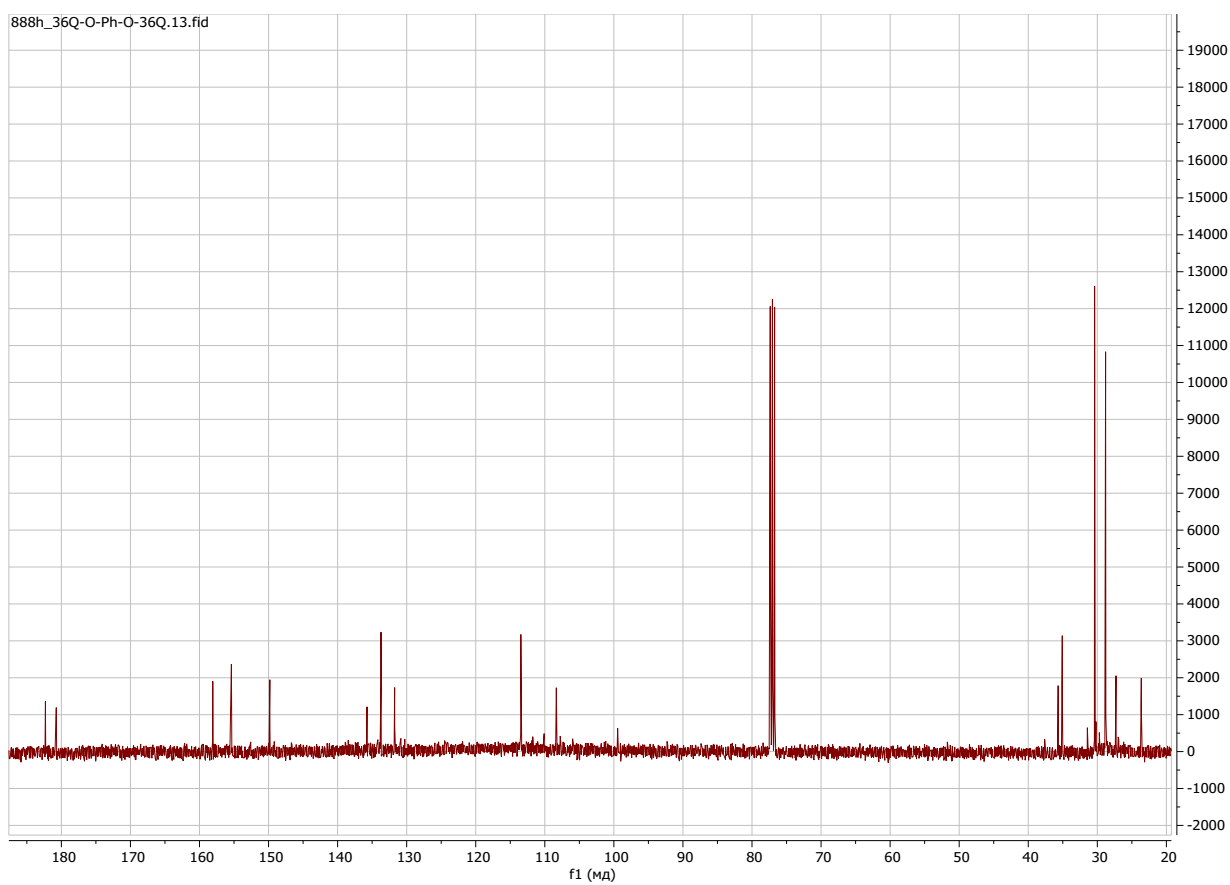

Figure. S125. <sup>13</sup>C NMR spectrum of **1** (CDCl<sub>3</sub>)

## Magnetic measurements data.

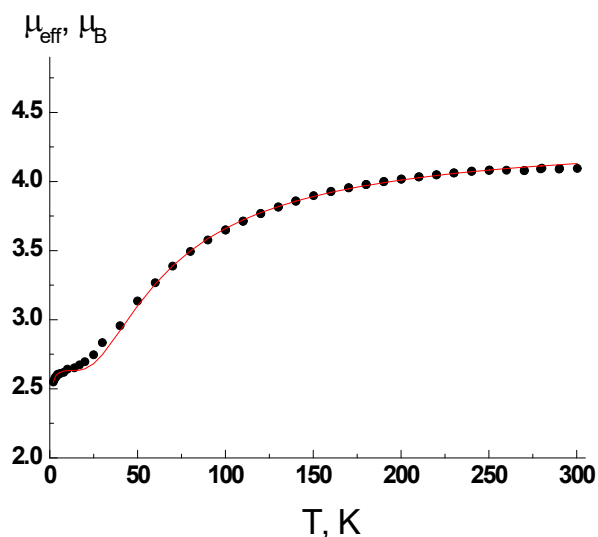

Figure. S126. Thermal dependence of  $\mu_{\text{eff}}$  for **2a** (circles), the red curve is an optimized fitting according  $H = -2J_{\text{Cu-SQ}}(S_{\text{SQ1}}S_{\text{Cu}} + S_{\text{Cu}}S_{\text{SQ2}}) - 2J_{\text{SQ-SQ}}S_{\text{SQ1}}S_{\text{SQ2}}$  spin Hamiltonian and  $g$ -factor of Cu(II) ions and exchange interaction parameters  $J_{\text{Cu-SQ}}$ ,  $J_{\text{SQ-SQ}}$  and  $zJ'$  are  $2.167 \pm 0.006$ ,  $-16.5 \pm 0.6 \text{ cm}^{-1}$ ,  $-32.8 \pm 0.9 \text{ cm}^{-1}$  and  $-0.05 \pm 0.01 \text{ cm}^{-1}$ .

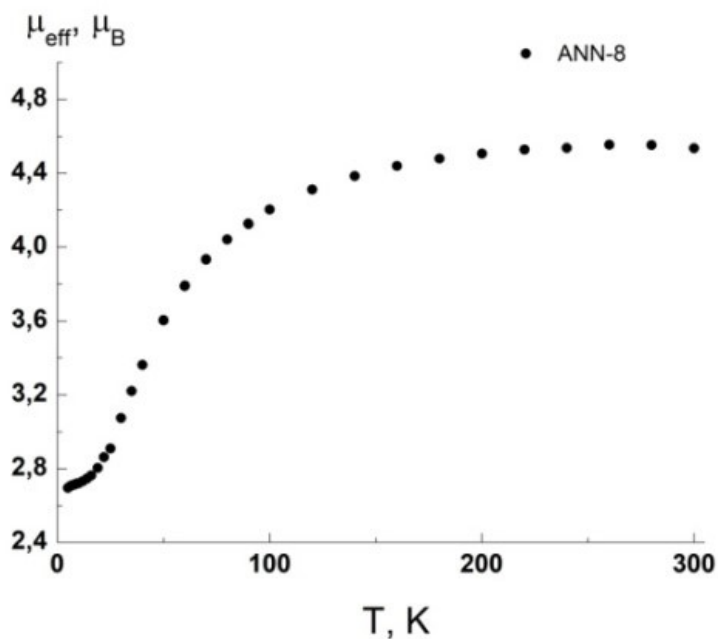

Figure. S127. Thermal dependence of  $\mu_{\text{eff}}$  for **2b**.

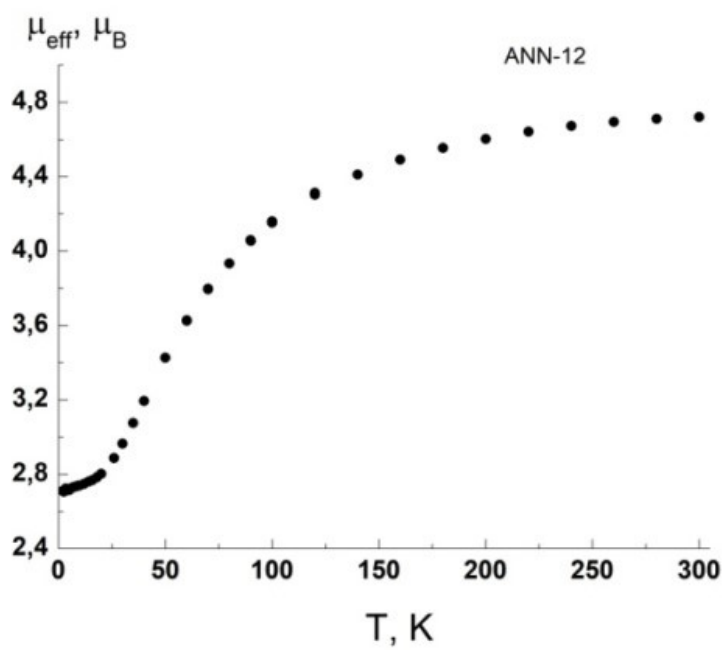

Figure. S128. Thermal dependence of  $\mu_{\text{eff}}$  for **2c**.



## Electrospray Ionization Mass Spectrometry Analysis

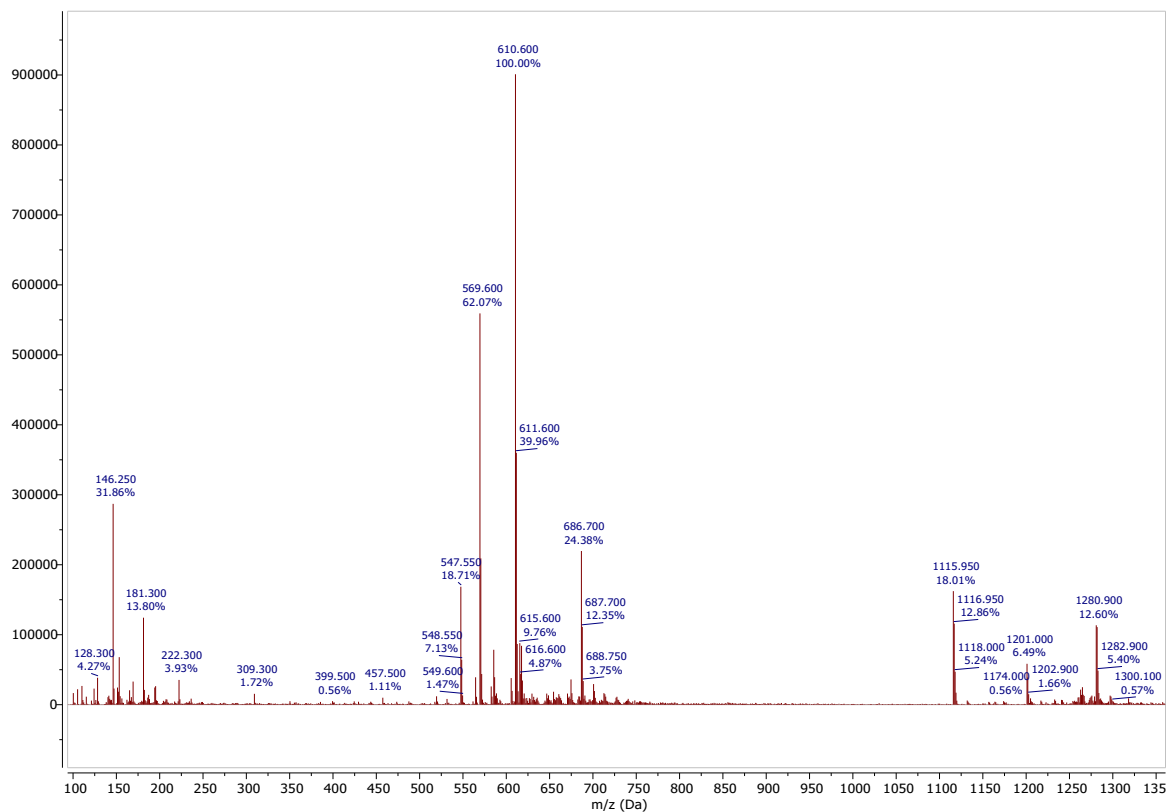

Figure. S129. Positive-ion mode ESI-MS of **2a** in MeCN.

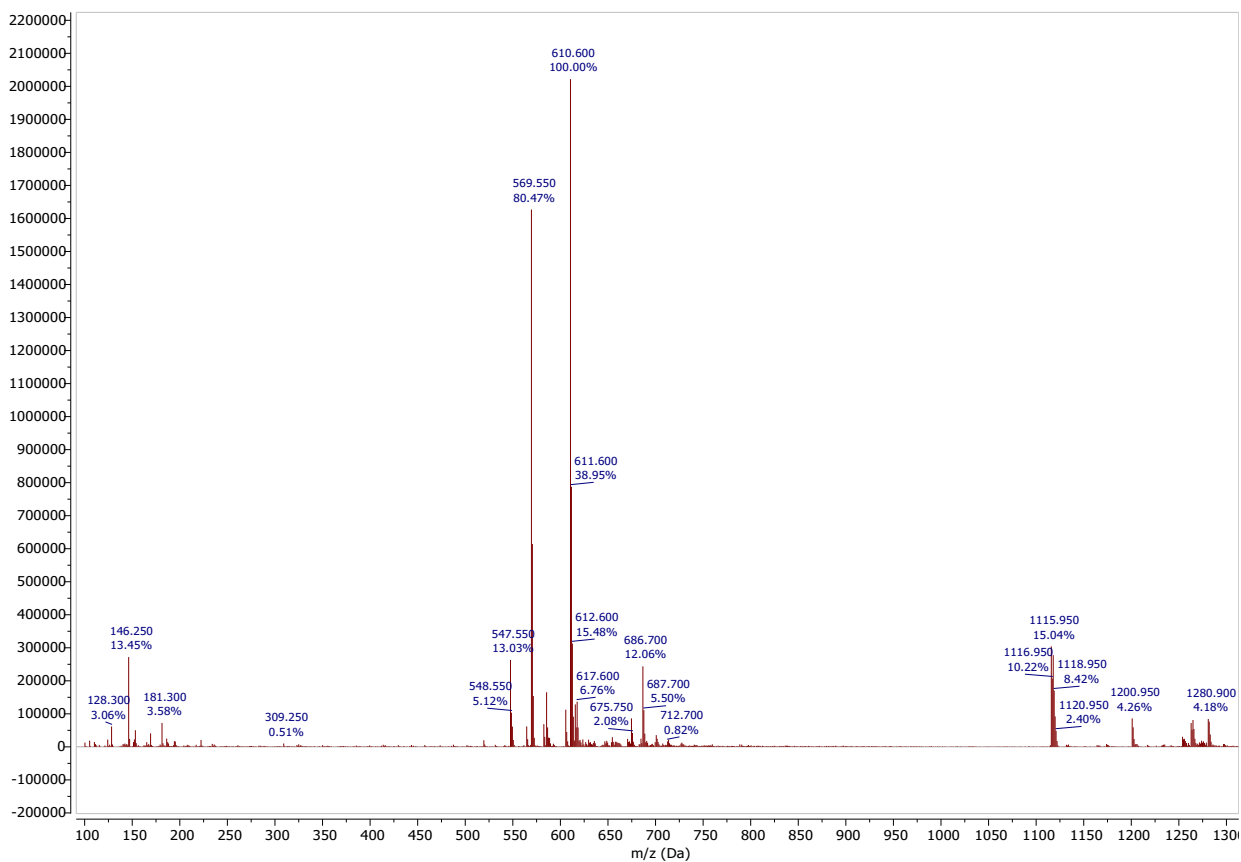

Figure. S130. Positive-ion mode ESI-MS of **2a** in  $\text{CH}_2\text{Cl}_2$ .

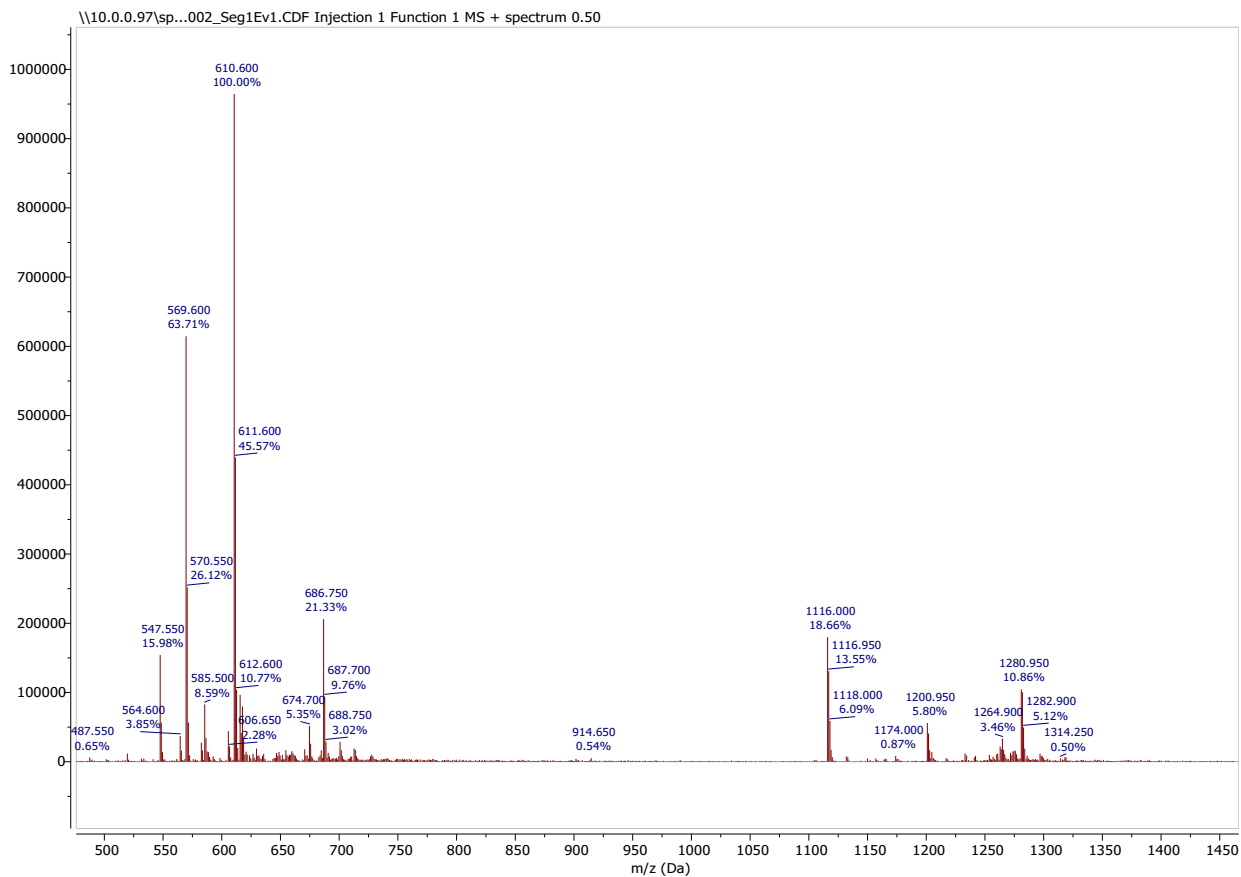

Figure. S131. Positive-ion mode ESI-MS of **2b** in MeCN.

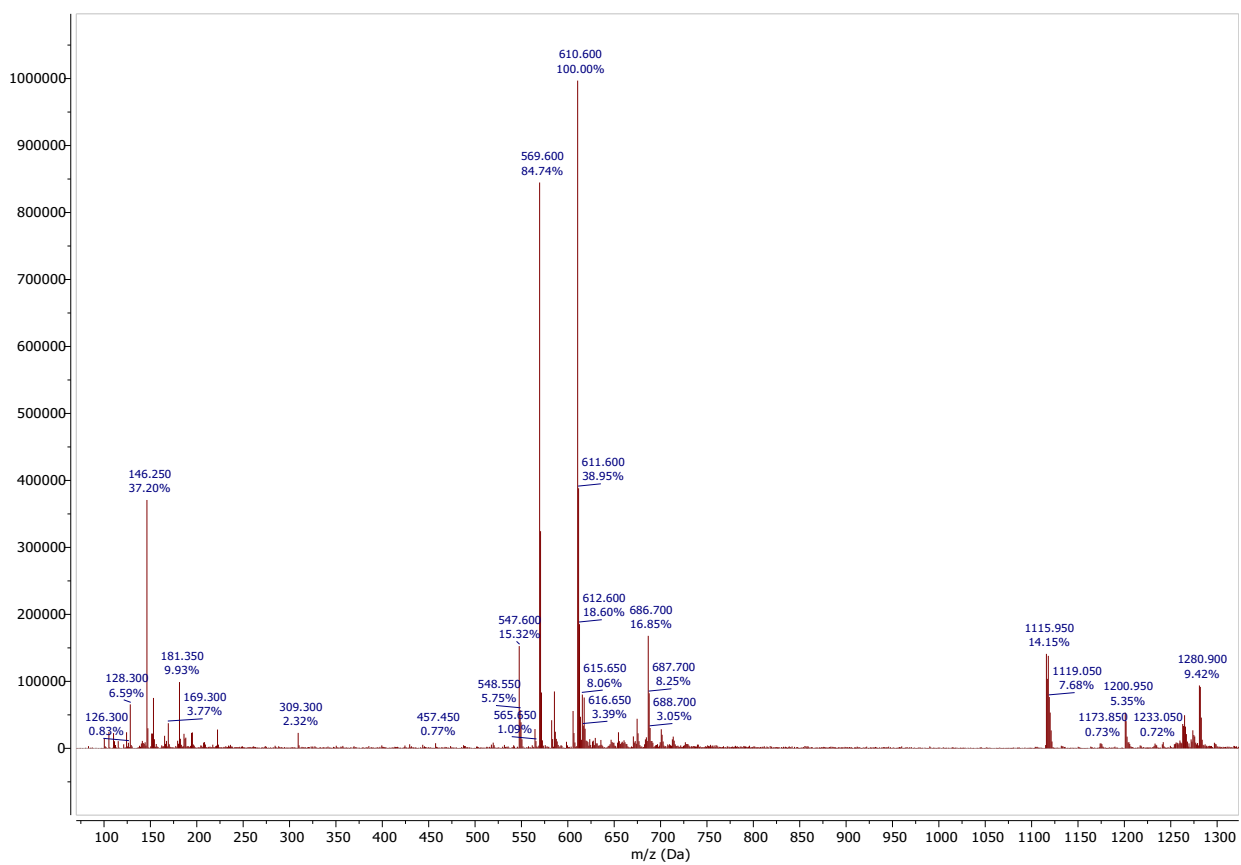

Figure. S132. Positive-ion mode ESI-MS of **2b** in CH<sub>2</sub>Cl<sub>2</sub>.

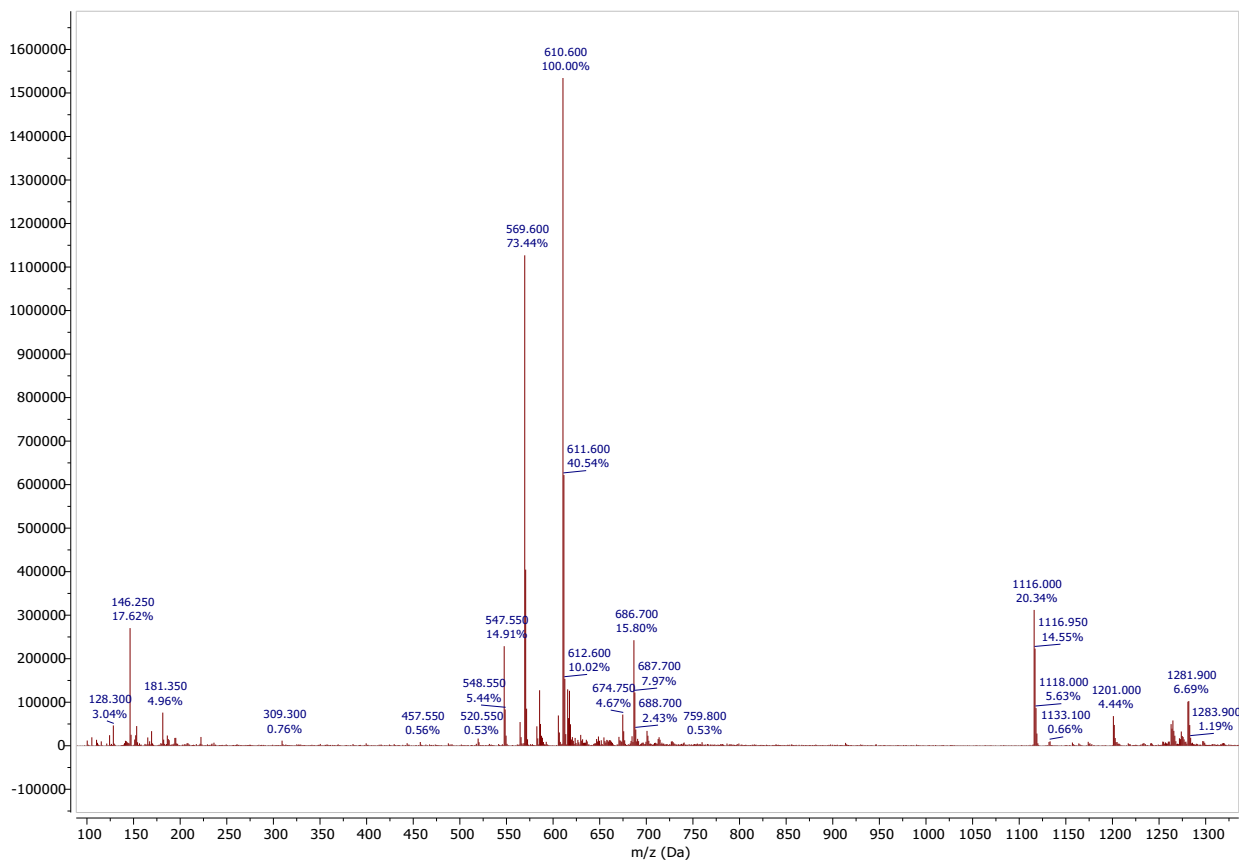

Figure. S133. Positive-ion mode ESI-MS of **2c** in MeCN.

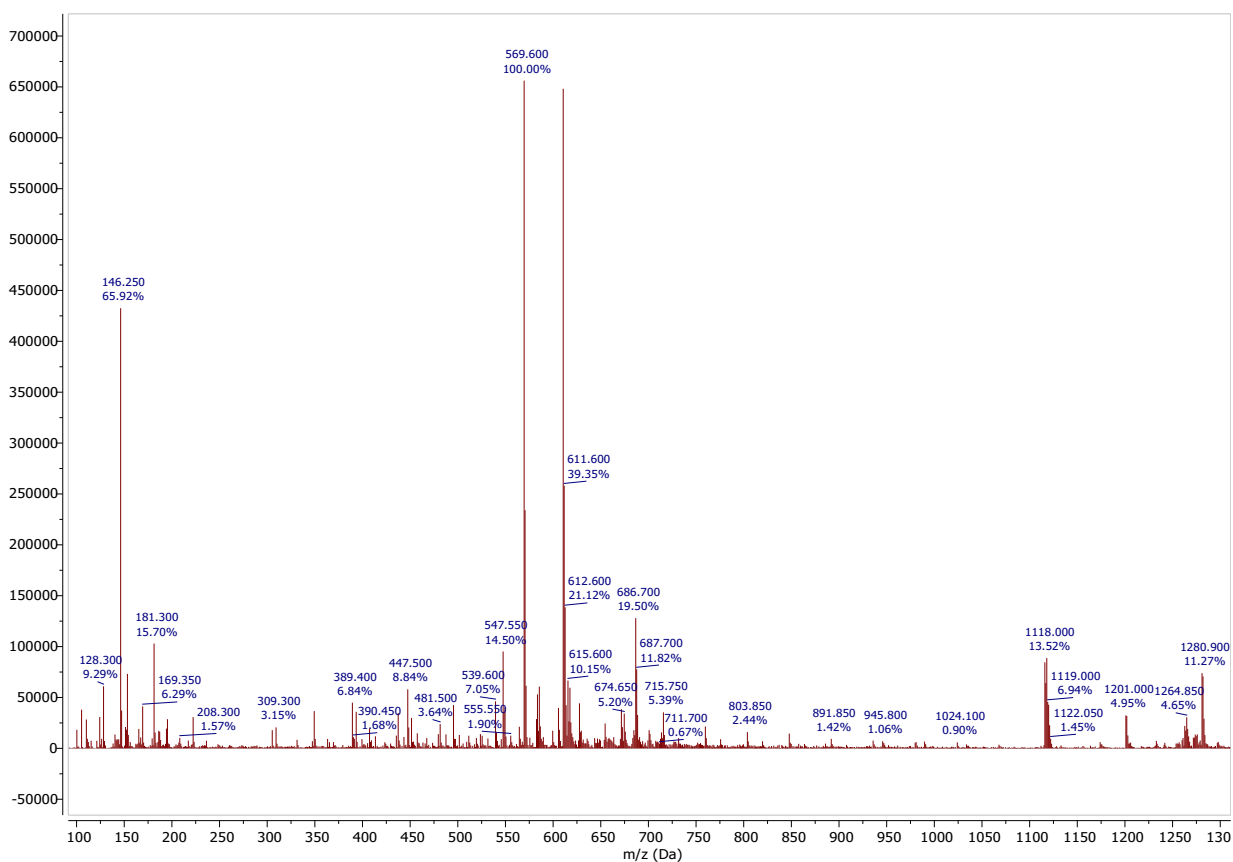

Figure. S134. Positive-ion mode ESI-MS of **2c** in CH<sub>2</sub>Cl<sub>2</sub>.
